# Supplementary material
Source: PubMed Central journal article supplement (PMC11136572)
Supplement: NIHMS1995503-supplement-appendix.pdf [file NIHMS1995503-supplement-appendix.pdf]

## Appendix

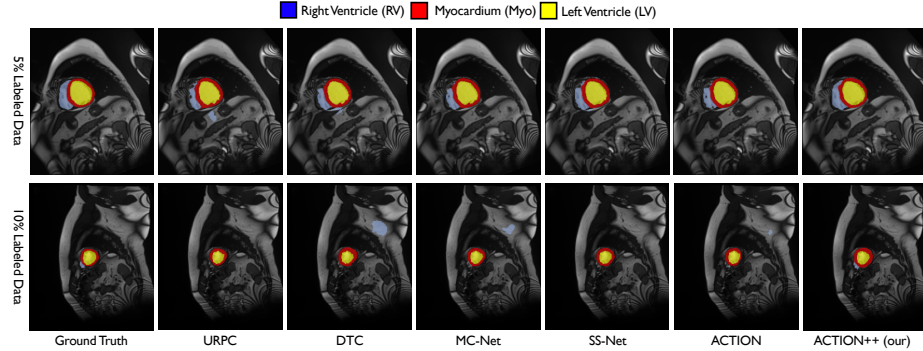

**Fig. 3.** Visualization results on ACDC with 5% and 10% labeled data. ACTION++ consistently outputs more accurate predictions, especially for small regions.

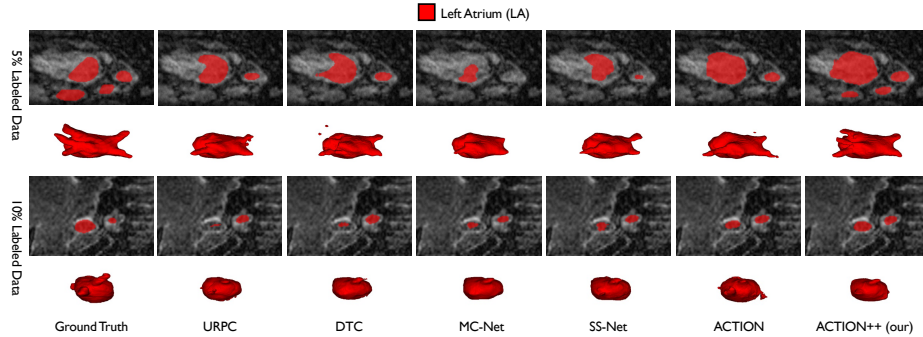

**Fig. 4.** Visualization results on LA with 5% and 10% labeled data. ACTION++ consistently achieves more sharper and accurate object boundaries.

**Table 5.** Ablation studies of different components (*i.e.*, ATS and SAACL).

| Method                    | DSC[%]↑     | ASD[voxel]↓ |
|---------------------------|-------------|-------------|
| pre-training w/o ATS      | 86.2        | 2.69        |
| pre-training w/ ATS       | 88.1        | 2.44        |
| fine-tuning w/o SAACL/ATS | 89.0        | 2.06        |
| fine-tuning only w/ ATS   | 89.3        | 1.98        |
| fine-tuning only w/ SAACL | 89.5        | 1.96        |
| fine-tuning w/ SAACL/ATS  | <b>89.9</b> | <b>1.74</b> |

**Table 6.** Effect of cosine period, different methods of varying  $\tau$ , and  $\lambda_a$ .

| $T/\#\text{iterations}$ | DSC         | Method | DSC         | $\lambda_a$ | DSC         |
|-------------------------|-------------|--------|-------------|-------------|-------------|
| no/fixed $\tau$         | 89.5        | fixed  | 89.5        | 0.05        | 88.5        |
| 0.1                     | 89.8        | step   | 89.4        | 0.1         | 89.3        |
| 0.2                     | 89.1        | rand   | 88.9        | 0.2         | <b>89.9</b> |
| 0.5                     | 89.2        | oscil. | 89.2        | 0.5         | 89.7        |
| 1.0                     | <b>89.9</b> | cos    | <b>89.9</b> | 1.0         | 89.1        |
| 2.0                     | 89.7        | -      | -           | 10          | 87.9        |

## A Theoretical Analysis

In this section, we discuss the performance guarantee of the proposed SAACL. For abstraction, we denote an image and its corresponding segmentation map as  $\mathbf{x} = \{\omega_p\}_p$ ,  $\mathbf{y} = \{y_p\}_p$ , where  $\omega_p$  is a pixel. We also denote the feature generator as  $f$ , such that  $f(\omega_p; \mathbf{x}) = \phi_p$  for any pixel  $p$ . Recent work [8] has shown that, to evaluate the performance of the representations learned via

contrastive learning (CL), it suffices to consider a simplified nearest neighbour (NN) classifier<sup>3</sup>  $g_f(\omega_p; \mathbf{x}) = \arg \min_{c \in [K]} \|f(\omega_p; \mathbf{x}) - \psi_c^*\|_2$ , where  $\psi_c^*$  denotes the center of class  $c$  in the latent representation space. To this end, we focus on the error rate of  $g_f$  defined as  $\mathcal{E}(g_f) = \sum_{c=1}^K \mathbb{P}[g_f(\omega_p; \mathbf{x}) \neq c, \forall \omega_p \in Cla_c]$ , where  $\omega_p \in Cla_c$  refers to pixels in class  $c$ . Note that each class  $c$ , regardless of being head or tail class, has equal weight in the definition of  $\mathcal{E}(g_f)$ , indicating that a small  $\mathcal{E}(g_f)$  implies good long-tail segmentation performance.

We now demonstrate that SAACL helps achieve a small error  $\mathcal{E}(g_f)$ . The success of contrastive learning mainly depends on two aspects: positive alignment and class divergence [8]. Specifically, the positive alignment is defined as follows:

$$A = \sqrt{\mathbb{E}_{\mathbf{x}, \tilde{\mathbf{x}}} \mathbb{E}_{c \in [K]} \mathbb{E}_{\omega_p \in Cla_c} [\|f(\omega_p; \mathbf{x}) - f(\omega_p; \tilde{\mathbf{x}})\|^2]}, \quad (7)$$

where  $\mathbf{x}$  and  $\tilde{\mathbf{x}}$  are two augmentations from the same input sample (*i.e.*, positive sample pairs). The class divergence is defined as  $D = \max_{c \neq c'} \bar{\phi}_c \cdot \bar{\phi}_{c'}$ , which computes the distances between class centers. The following theorem discloses the link between the error rate and the alignment  $A$  and class divergence  $D$ .

**Theorem 1 ([8]).** *There exist some constant  $\rho(\sigma, \delta, \epsilon)$  and  $\Delta$  whose value depends on the data augmentation method and Lipschitzness of the model  $f$ . Let  $\zeta(\sigma, \delta, \epsilon) = r^2[1 - \rho(\sigma, \delta, \epsilon) - \sqrt{2\rho(\sigma, \delta, \epsilon) - \Delta/2}]$ . If for any class  $c, c' \in [K]$ , it holds that  $\bar{\phi}_c \cdot \bar{\phi}_{c'} \leq \zeta(\sigma, \delta, \epsilon)$ , then  $\mathcal{E}(g_f) \leq 1 - \sigma + \mathcal{O}(1/\epsilon)A$ .*

Due to space limit, please refer to Theorem 1 in [8] for the detailed mathematical form of  $\rho(\sigma, \delta, \epsilon)$ ,  $\Delta$  and the problem-related parameters  $\sigma$ ,  $\delta$  and  $\epsilon$ . For our purpose, we observe that: (1) good positive alignment (small  $A$ ) directly indicates low error according to the error upper bound; (2) a large class divergence (small  $D$ ) can help satisfy the condition on  $\bar{\phi}_c \cdot \bar{\phi}_{c'}$ . Therefore, both  $A$  and  $D$  are crucial to improving the representation learning.

From (5), both the alignment and the diversity are captured by the objective  $\mathcal{L}_{\text{aaco}}$ . We rewrite (5) as  $\mathcal{L}_{\text{aaco}} = \sum_{i=1}^n (\mathcal{L}_{i,1} + \lambda_a \mathcal{L}_{i,2})/n$ , where  $\mathcal{L}_{i,1}$  equals:

$$-\sum_{\phi_i^+} \log \frac{\exp(\phi_i \cdot \phi_i^+ / \tau_{sa})}{\sum_{\phi_j} \exp(\phi_i \cdot \phi_j / \tau_{sa})} = -\sum_{\phi_i^+} \phi_i \cdot \phi_i^+ / \tau_{sa} - \sum_{\phi_i^+} \log \sum_{\phi_j} \exp(\phi_i \cdot \phi_j / \tau_{sa}).$$

Here the first term in the above can be rewrite as  $\sum_{\phi_i^+} \|\phi_i - \phi_i^+\|^2 / (2\tau_{sa}) - 1$  given the normalization  $\|\phi_p\| = 1$  for all pixels  $p$ . Then by the definition  $f(\omega_p; \mathbf{x}) = \phi_p$  and (7), it is clear that  $\mathcal{L}_{i,1}$  induces small  $A$  (*i.e.* good alignment).

Similar analysis shows  $\mathcal{L}_{i,2}$  encourages  $\phi_i$  to be close to the pre-computed optimal class center  $\nu_i$  (small  $\|\phi_i - \nu_i\|$ ). The class centers computed from solving (3) induces large distance  $\|\nu_i - \nu_j\|$  between centers. Furthermore, since (3) does not involve any data yet, it is immune to long-tailness and can guarantee well-separated centers for the representation of tail classes. Together it holds that  $\mathcal{L}_{i,2}$  encourages large  $\|\bar{\phi}_c - \bar{\phi}_{c'}\|$  for  $c \neq c'$ , or equivalently small  $\bar{\phi}_c \cdot \bar{\phi}_{c'}$ , which is exactly the class divergence.

<sup>3</sup> This is because an NN classifier is a special case of a linear classifier, which can be approximated by a neural network. See Sec. 2 of [8].
